# Supplementary material for: Tuning the aggregation of an amphiphilic anionic calix[5]arene by selective host–guest interactions with bola-type dications
Source: Royal Society of Chemistry journal article supplement (doi:10.1039/c9nj01198f), 2019-01-01
Supplement: c9nj01198f1.pdf [file c9nj01198f1.pdf]

## Electronic Supplementary Information

# Tuning the Aggregation of an Amphiphilic Anionic Calix[5]arene by Selective Host-guest Interactions with Bola-type Dications

Ilenia Pisagatti,<sup>a</sup> Lucia Barbera,<sup>a</sup> Giuseppe Gattuso,<sup>a</sup> Valentina Villari,<sup>b</sup> Norberto Micali,<sup>b</sup> Enza Fazio,<sup>c</sup> Fortunato Neri,<sup>c</sup> Melchiorre F. Parisi<sup>a</sup> and Anna Notti<sup>a,\*</sup>

<sup>a</sup>*Dipartimento di Scienze Chimiche, Biologiche, Farmaceutiche ed Ambientali, Università di Messina, Viale F. Stagno d'Alcontres, 31 98166 Messina, Italy.* <sup>b</sup>*CNR-IPCF Istituto per i Processi Chimico-Fisici, Viale F. Stagno d'Alcontres 37, 98158 Messina, Italy.* <sup>c</sup>*Dipartimento di Scienze Matematiche e Informatiche, Scienze Fisiche e Scienze della Terra (MIFT), Università di Messina, Viale F. Stagno d'Alcontres, 31 98166 Messina, Italy.*

| Contents                                                                                                                                                 | page       |
|----------------------------------------------------------------------------------------------------------------------------------------------------------|------------|
| <b>Figure S1.</b> DLS size distribution of the aggregates present in aqueous solution of <b>1</b> and 2:1 <b>1/NC<sub>8</sub>N</b> mixtures.             | <b>S3</b>  |
| <b>Figure S2.</b> DLS size distribution of the aggregates present in aqueous solution of <b>1</b> and 2:1 <b>1/NC<sub>16</sub>N</b> mixtures.            | <b>S3</b>  |
| <b>Figure S3.</b> <sup>1</sup> H NMR titration spectra of <b>1</b> and <b>NC<sub>8</sub>N</b> .                                                          | <b>S4</b>  |
| <b>Figure S4.</b> <sup>1</sup> H NMR titration spectra of <b>1</b> and <b>NC<sub>10</sub>N</b> .                                                         | <b>S4</b>  |
| <b>Figure S5.</b> <sup>1</sup> H NMR titration spectra of <b>1</b> and <b>NC<sub>12</sub>N</b> .                                                         | <b>S5</b>  |
| <b>Figure S6.</b> <sup>1</sup> H NMR dilution experiment of <b>1/NC<sub>12</sub>N</b> samples.                                                           | <b>S5</b>  |
| <b>Figure S7.</b> <sup>1</sup> H NMR titration spectra of <b>1</b> and <b>NC<sub>16</sub>N</b> .                                                         | <b>S6</b>  |
| <b>Cac determination of NC<sub>10</sub>N/type-II bola-amphiphile</b>                                                                                     | <b>S7</b>  |
| <b>Figure S8.</b> <sup>1</sup> H NMR dilution experiment of <b>NC<sub>10</sub>N/type-II</b> aggregate.                                                   | <b>S7</b>  |
| <b>Figure S9.</b> Plot of the self-diffusion coefficients ( <i>D</i> ) vs the inverse of <b>NC<sub>10</sub>N/type-II</b> bola-amphiphile concentrations. | <b>S8</b>  |
| <b>Cac determination of NC<sub>16</sub>N/type-I bola-amphiphile</b>                                                                                      | <b>S8</b>  |
| <b>Figure S10.</b> Plot of Sudan I absorbance variations vs <b>NC<sub>16</sub>N/type-I</b> bola amphiphile concentrations.                               | <b>S8</b>  |
| <b>Figure S11.</b> VT <sup>1</sup> H NMR spectra (D <sub>2</sub> O, 500 MHz, 298 K) of [ <b>1</b> ] = [ <b>NC<sub>10</sub>N</b> ] = 0.4 mM.              | <b>S9</b>  |
| <b>Figure S12.</b> VT <sup>1</sup> H NMR spectra (D <sub>2</sub> O, 500 MHz, 298 K) of [ <b>1</b> ] = [ <b>NC<sub>16</sub>N</b> ] = 0.4 mM.              | <b>S9</b>  |
| <b>Tamoxifen solubilisation experiments</b>                                                                                                              | <b>S10</b> |
| <b>Figure S13.</b> <sup>1</sup> H NMR experiment with tamoxifen.                                                                                         | <b>S10</b> |

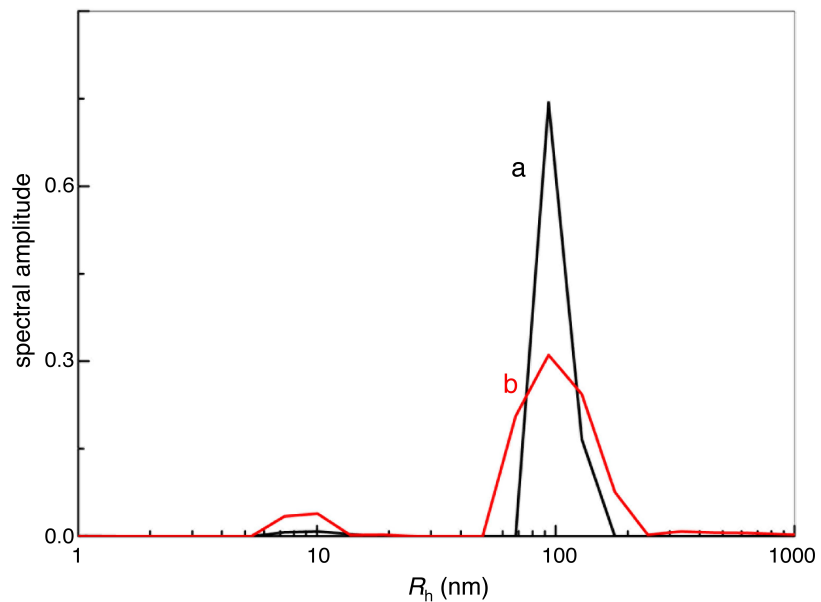

**Figure S1.** DLS size distribution of the aggregates present in aqueous solutions of: (a)  $[1] = 0.1$  mM; (b)  $[1] = 0.1$  mM and  $[NC_8N] = 0.05$  mM. The spectral amplitude represents the intensity-related contribution of each scatterer.

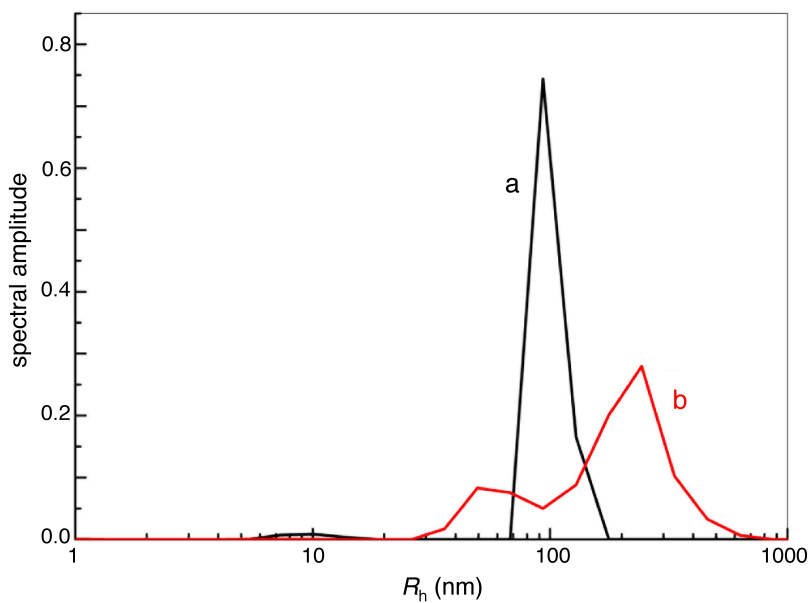

**Figure S2.** DLS size distribution of the aggregates present in aqueous solutions of: (a)  $[1] = 0.1$  mM; (b)  $[1] = 0.1$  mM and  $[NC_{16N}] = 0.05$  mM. The spectral amplitude represents the intensity-related contribution of each scatterer.

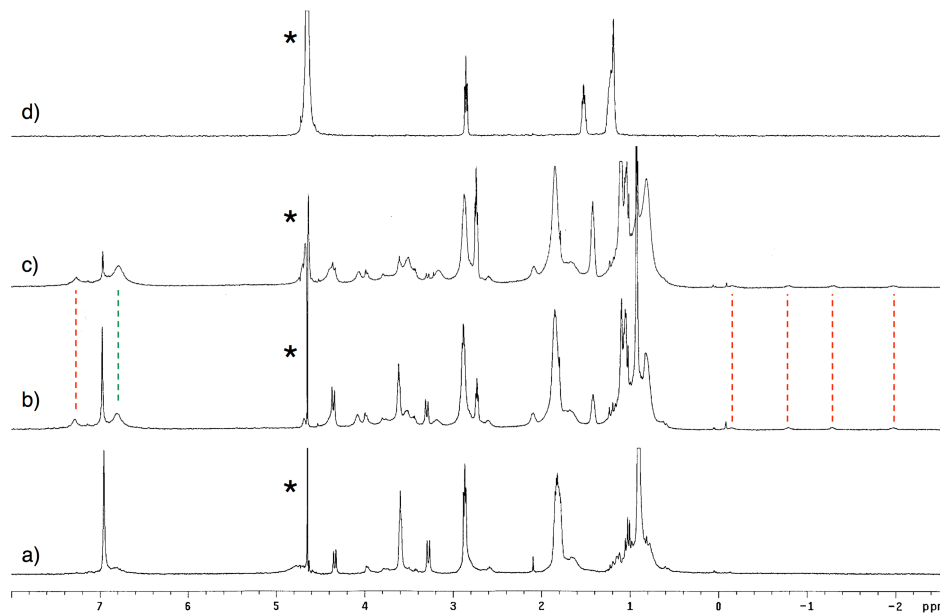

**Figure S3.**  $^1\text{H}$  NMR spectra ( $\text{D}_2\text{O}$ , 500 MHz, 298 K) of: (a)  $[\mathbf{1}] = 0.4$  mM; (b)  $[\mathbf{1}] = 0.4$  mM and  $[\text{NC}_8\text{N}] = 0.2$  mM; (c)  $[\mathbf{1}] = [\text{NC}_8\text{N}] = 0.4$  mM; (d)  $[\text{NC}_8\text{N}] = 0.4$  mM. Red and green dashed lines refer to selected resonances of the type-I aggregate and the catanionic aggregate respectively. The suppressed HDO resonance is marked with an asterisk.

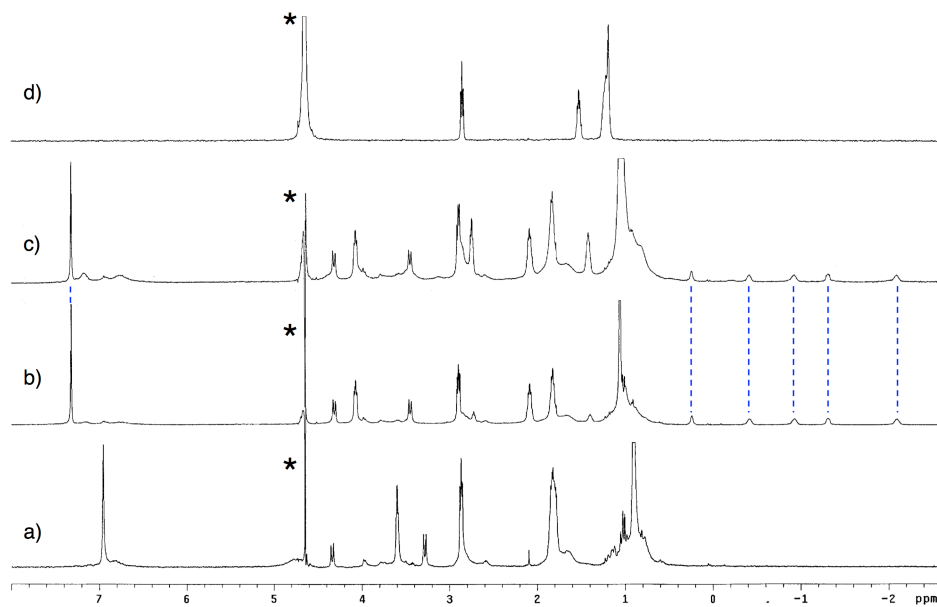

**Figure S4.**  $^1\text{H}$  NMR spectra ( $\text{D}_2\text{O}$ , 500 MHz, 298 K) of: (a)  $[\mathbf{1}] = 0.4$  mM; (b)  $[\mathbf{1}] = 0.4$  mM and  $[\text{NC}_{10}\text{N}] = 0.2$  mM; (c)  $[\mathbf{1}] = [\text{NC}_{10}\text{N}] = 0.4$  mM; (d)  $[\text{NC}_{10}\text{N}] = 0.4$  mM. Blue dashed lines refer to selected resonances of the type-II complex. The suppressed HDO resonance is marked with an asterisk.

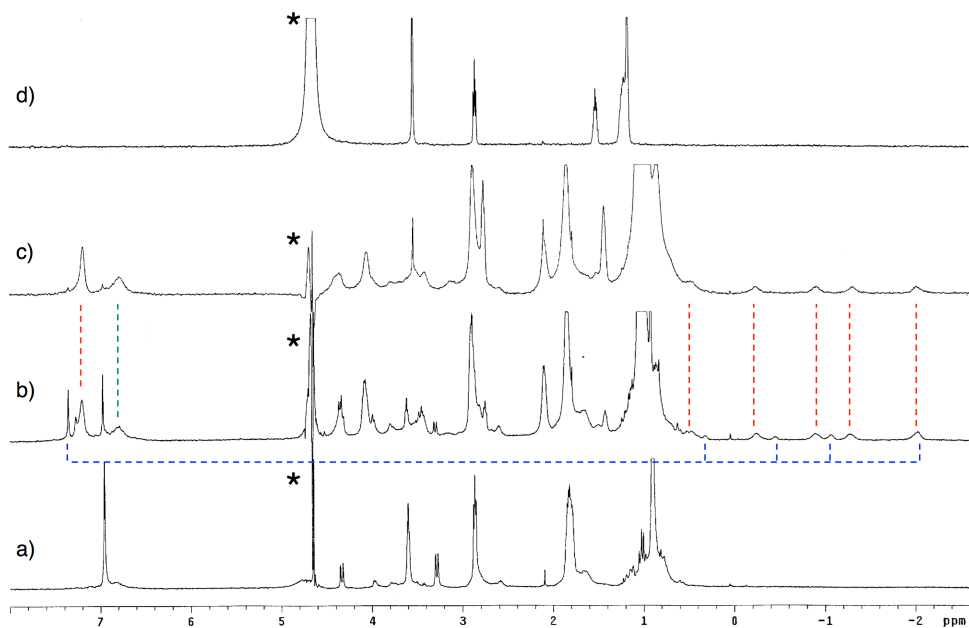

**Figure S5.**  $^1\text{H}$  NMR spectra ( $\text{D}_2\text{O}$ , 500 MHz, 298 K) of: (a)  $[\mathbf{1}] = 0.4$  mM; (b)  $[\mathbf{1}] = 0.4$  mM and  $[\text{NC}_{12}\text{N}] = 0.2$  mM; (c)  $[\mathbf{1}] = [\text{NC}_{12}\text{N}] = 0.4$  mM; (d)  $[\text{NC}_{12}\text{N}] = 0.4$  mM. Red, blue and green dashed lines indicate selected resonances of the type-I aggregate, the type-II complex and the catanionic aggregate, respectively. The suppressed HDO resonance is marked with an asterisk.

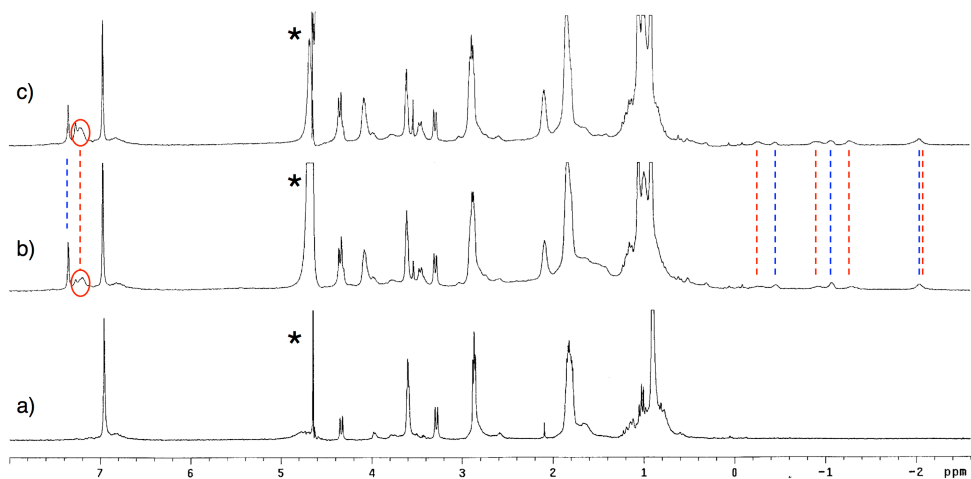

**Figure S6.**  $^1\text{H}$  NMR spectra ( $\text{D}_2\text{O}$ , 500 MHz, 298 K) of: (a)  $[\mathbf{1}] = 0.4$  mM; (b)  $[\mathbf{1}] = 0.2$  mM and  $[\text{NC}_{12}\text{N}] = 0.05$  mM; (c)  $[\mathbf{1}] = 0.4$  mM and  $[\text{NC}_{12}\text{N}] = 0.1$  mM. Red and blue dashed lines refer to selected resonances of the type-I aggregate and the type-II complex respectively. The suppressed HDO resonance is marked with an asterisk.

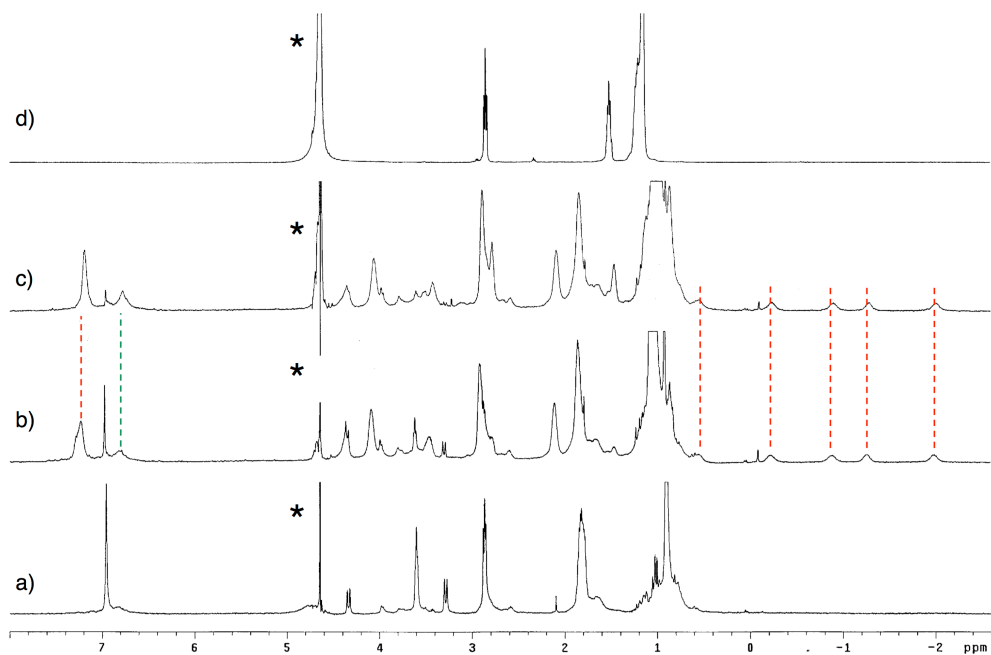

**Figure S7.**  $^1\text{H}$  NMR spectra ( $\text{D}_2\text{O}$ , 500 MHz, 298 K) of: (a)  $[\mathbf{1}] = 0.4$  mM; (b)  $[\mathbf{1}] = 0.4$  mM and  $[\text{NC}_{16}\text{N}] = 0.2$  mM; (c)  $[\mathbf{1}] = [\text{NC}_{16}\text{N}] = 0.4$  mM; (d)  $[\text{NC}_{16}\text{N}] = 0.4$  mM. Red and green dashed lines refer to selected resonances of the type-I aggregate and the catanionic aggregate respectively. The suppressed HDO resonance is marked with an asterisk.

### Cac determination of NC<sub>10</sub>N/type-II bola-amphiphile.

Self-diffusion coefficients of the type-II bola-amphiphile were determined in 2:1 **1**/NC<sub>10</sub>N D<sub>2</sub>O solutions with concentrations of **1** ranging from 0.4 to 6.2 mM. The weighted average of the diffusion coefficients of the monomer and the aggregates was conveniently extracted from the resonances of thiomethylene groups ( $\delta = 2.83$  ppm) that were found to be isochronous over the entire concentration range under investigation. A cac value of 0.77 mM was estimated from the intersection point of the two lines best fitting the experimental data points obtained by plotting the  $D_{\text{obs}}$  vs the inverse of the type-II complex concentration. The concentration of the complex is based on that of NC<sub>10</sub>N, assuming that all the guest was consumed to afford the supramolecular capsule.

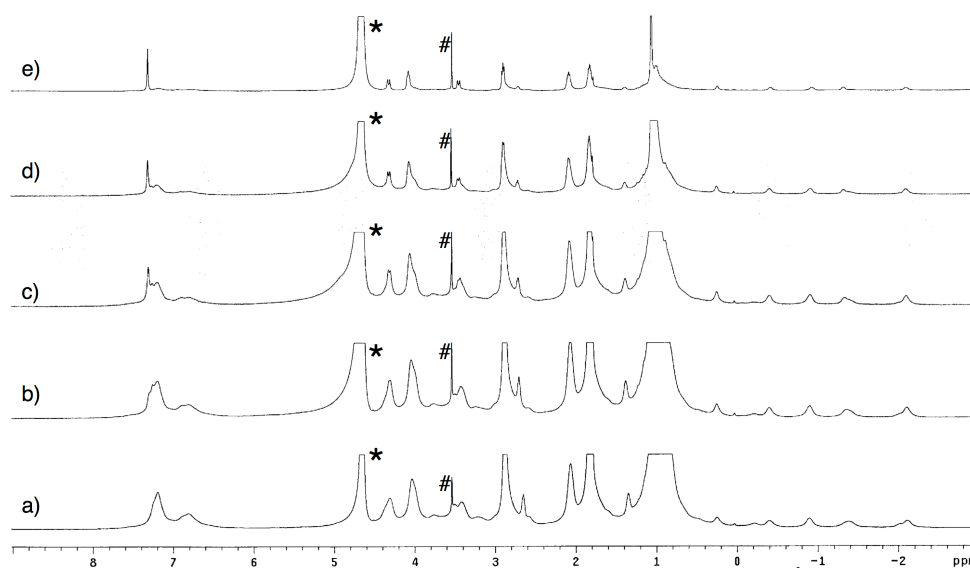

**Figure S8.** <sup>1</sup>H NMR spectra (D<sub>2</sub>O, 500 MHz, 298 K) of: (a) [**1**] = 6.2 mM and [NC<sub>10</sub>N] = 3.1 mM; (b) [**1**] = 4.0 mM and [NC<sub>10</sub>N] = 2.0 mM; (c) [**1**] = 2.5 mM and [NC<sub>10</sub>N] = 1.75 mM; (d) [**1**] = 1.0 mM and [NC<sub>10</sub>N] = 0.5 mM; e) [**1**] = 0.4 mM and [NC<sub>10</sub>N] = 0.2 mM. Asterisks and hashtags indicate residual solvent peaks.

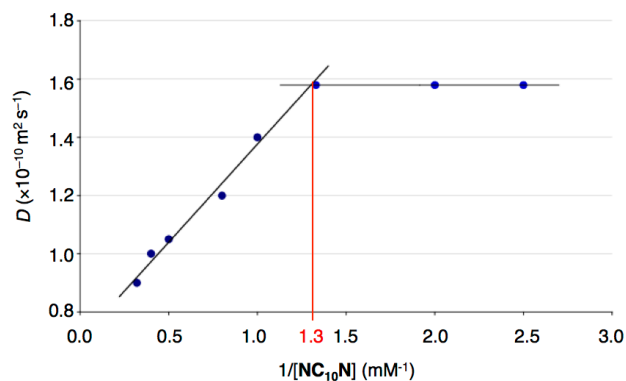

**Figure S9.** Plot of the self-diffusion coefficients ( $D$ ) vs the inverse of  $\text{NC}_{10}\text{N}$  concentration.

### Cac determination of $\text{NC}_{16}\text{N}$ /type-I bola-amphiphile by dye solubilisation experiments.

The dye solubilisation experiments were carried out by adding an excess of Sudan I (as a solid) to equimolar solutions of **1** and  $\text{NC}_{16}\text{N}$  of different concentrations ( $[\mathbf{1}] = [\text{NC}_{16}\text{N}] = 0\text{--}400 \mu\text{M}$ ). Solutions were left to equilibrate for 24 h at room temperature, filtered through a  $0.4 \mu\text{m}$  Millipore filter, to remove excess undissolved dye, and their absorbance measured at  $\lambda = 485 \text{ nm}$ . The cac of the  $\text{NC}_{16}\text{N}$ /type-I bola-amphiphile was derived from the intersection between the two lines best fitting the experimental data points of the dye  $\text{Abs}_{485} \text{ vs } [\mathbf{1}] = [\text{NC}_{16}\text{N}]$  plot. The formation of  $\mathbf{1}/\text{NC}_{16}\text{N}$  type-I aggregates was seen to start at a concentration of  $[\mathbf{1}] = [\text{NC}_{16}\text{N}] = 17 \mu\text{M}$ .

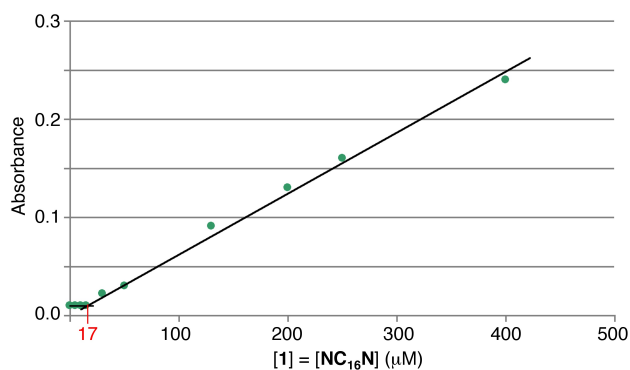

**Figure S10.** Sudan I absorbance variations (at 485 nm) for increasing concentrations of type-I bola-amphiphile (reported as  $[\mathbf{1}] = [\text{NC}_{16}\text{N}]$ ).



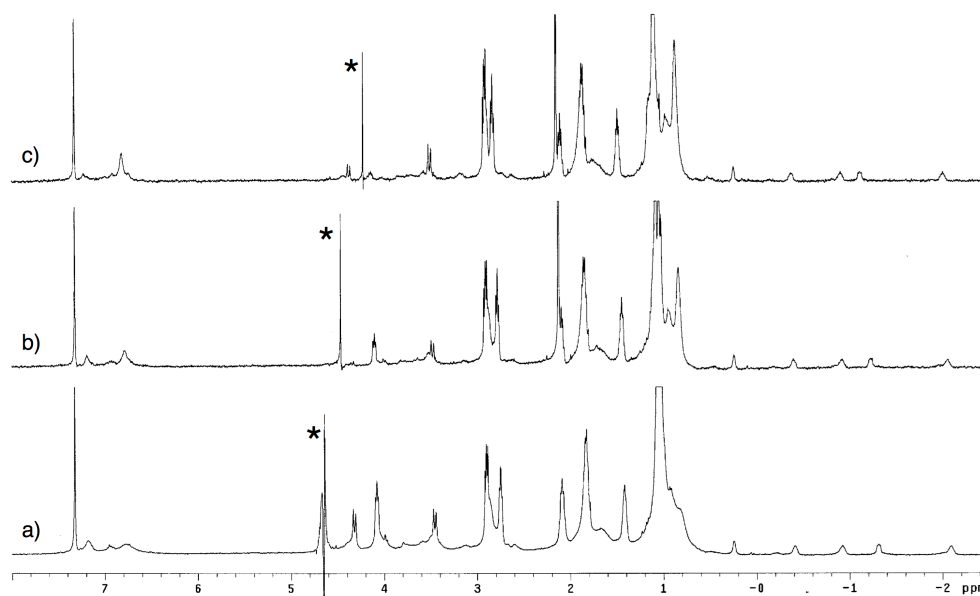

**Figure S11.**  $^1\text{H}$  NMR spectra ( $\text{D}_2\text{O}$ , 500 MHz) of  $[1] = [\text{NC}_{10}\text{N}] = 0.4$  mM at: (a)  $T = 298$  K, (b)  $T = 318$  K and (c)  $T = 348$  K. The suppressed HDO resonance is marked with an asterisk.

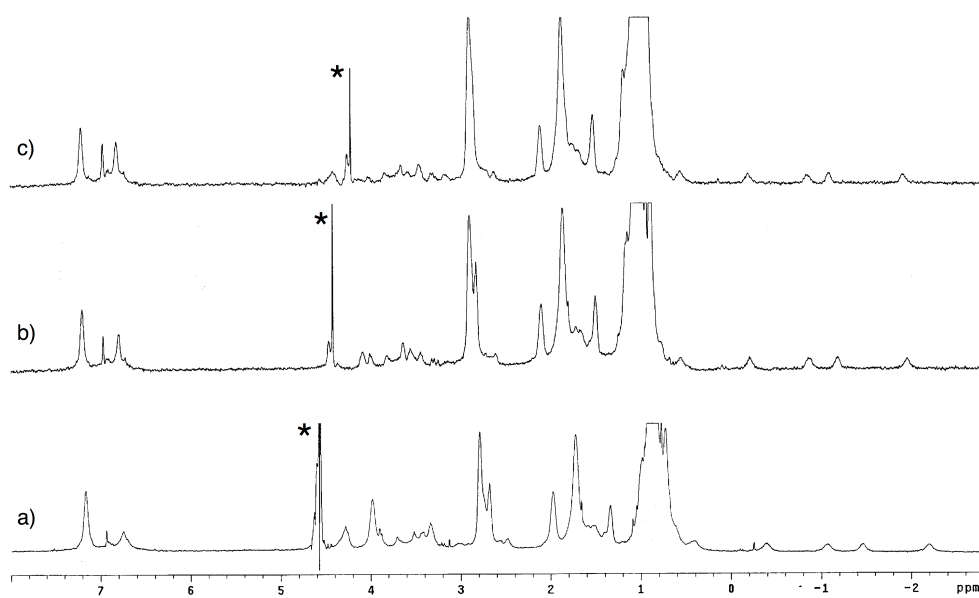

**Figure S12.**  $^1\text{H}$  NMR spectra ( $\text{D}_2\text{O}$ , 500 MHz) of  $[1] = [\text{NC}_{16}\text{N}] = 0.4$  mM at: (a)  $T = 298$  K, (b)  $T = 318$  K and (c)  $T = 348$  K. The suppressed HDO resonance is marked with an asterisk.

### Tamoxifen solubilisation experiments.

Solid tamoxifen (1  $\mu\text{mol}$ ) was added to a 0.4 mM solution of **1** and **NC<sub>16</sub>N** (1:1) in ultrapure H<sub>2</sub>O (1.0 mL). After equilibration for 24 h at room temperature in the dark, the solution was centrifugated (6000 rpm) for 10 minutes to remove undissolved solid. 900  $\mu\text{L}$  of the supernatant were extracted with 900  $\mu\text{L}$  of CHCl<sub>3</sub> in a screw-top vial for 12 h at 20 °C. The organic phase was diluted 10 times prior to UV analysis. The solubilization experiment was performed in triplicate and the amount of the extracted tamoxifen (140 $\pm$ 3  $\mu\text{g}$ ) was determined from the absorbance value at  $\lambda = 275 \text{ nm}$ .

200  $\mu\text{L}$  of CDCl<sub>3</sub> were added to 300  $\mu\text{L}$  of the tamoxifen chloroformic solution and the concentration of recovered tamoxifen was determined from the integral of selected peaks by using the quantitative qNMR Varian Vnmrj 3.2 software.

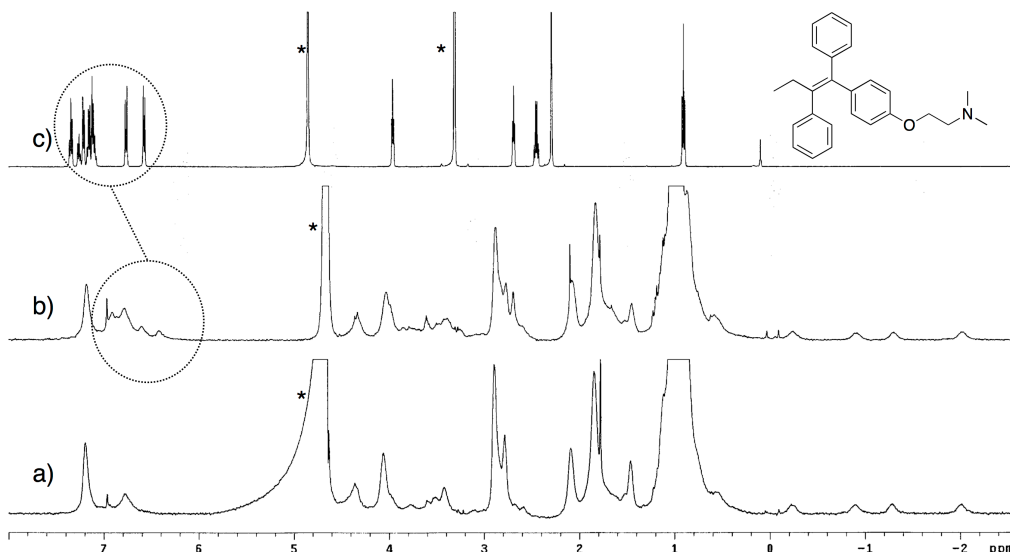

**Figure S13.** <sup>1</sup>H NMR spectra (500 MHz, 298 K) of a D<sub>2</sub>O solution of [**1**] = [**NC<sub>16</sub>N**] = 0.4 mM (a) prior to and (b) after extraction of tamoxifen; (c) tamoxifen in CD<sub>3</sub>OD.
